# Supplementary material for: Fluorescence wavelength shifts combined with light scattering for ratiometric sensing of chloride in the serum based on CsPbBr3@SiO2 perovskite nanocrystal composite halide exchanges
Source: Royal Society of Chemistry journal article supplement (doi:10.1039/d3dt01871g), 2023-01-01
Supplement: d3dt01871g1.pdf [file d3dt01871g1.pdf]

## Electronic Supplementary Information

For

# Fluorescence Wavelength Shift Combining with Light Scattering for Ratiometric Sensing of Chloride in the Serum based on CsPbBr<sub>3</sub>@SiO<sub>2</sub> Perovskite Nanocrystals Composites Halide Exchanges

Peng Zhang<sup>al†</sup>, Liming Chen<sup>bl†</sup>, Xiaoyan Cai<sup>b</sup>, Binbin Luo<sup>\*c</sup>, Haini Chen<sup>a</sup>, Tianju Chen<sup>\*a</sup>, Guoliang Chen<sup>a</sup>, Feiming Li<sup>\*a</sup>

<sup>a</sup>College of Chemistry, Chemical Engineering and Environment, Minnan Normal University, Zhangzhou, 363000, P.R. China

<sup>b</sup>Zhangzhou Affiliated Hospital of Fujian Medical University, Zhangzhou, 363000, P.R. China

<sup>c</sup>Department of Chemistry and Key Laboratory for Preparation and Application of Ordered Structural Materials of Guangdong Province, Shantou University, Shantou, Guangdong 515063, China

<sup>†</sup>Peng Zhang and Liming Chen contributed equally to this work

\*Email: lfm1914@mnnu.edu.cn(Feiming Li), 874327120@qq.com(Tianju Chen)

## Fluorescence Wavelength Shift Combining with Light Scattering for Ratiometric Sensing of Chloride in the Serum based on CsPbBr<sub>3</sub>@SiO<sub>2</sub> Perovskite Nanocrystals Composites Halide Exchanges

Peng Zhang<sup>†a</sup>, Liming Chen<sup>†b</sup>, Xiaoyan Cai<sup>b</sup>, Tianju Chen<sup>\*a</sup>, Haini Chen<sup>a</sup>, Guoliang Chen<sup>a</sup> and Feiming Li<sup>\*a</sup>

## Supplemental Figures

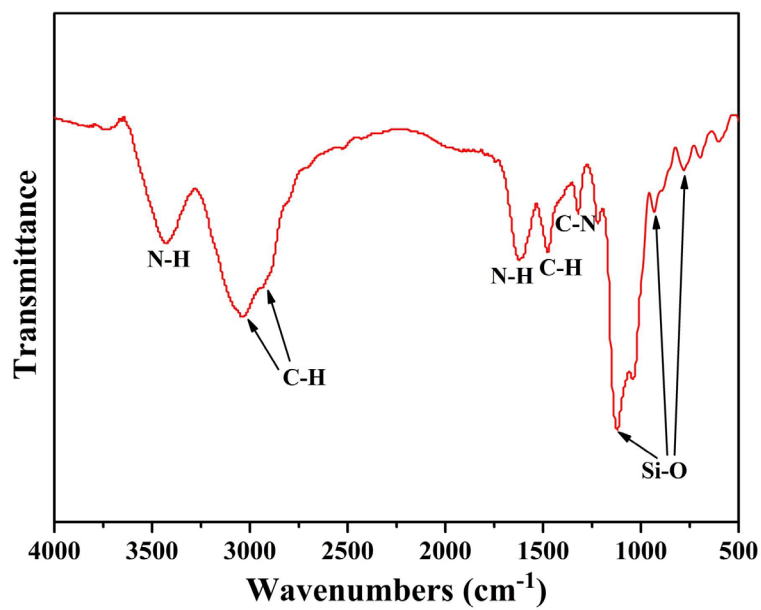

Figure S1. FTIR spectra of CsPbBr<sub>3</sub>@SiO<sub>2</sub> PNCCs.

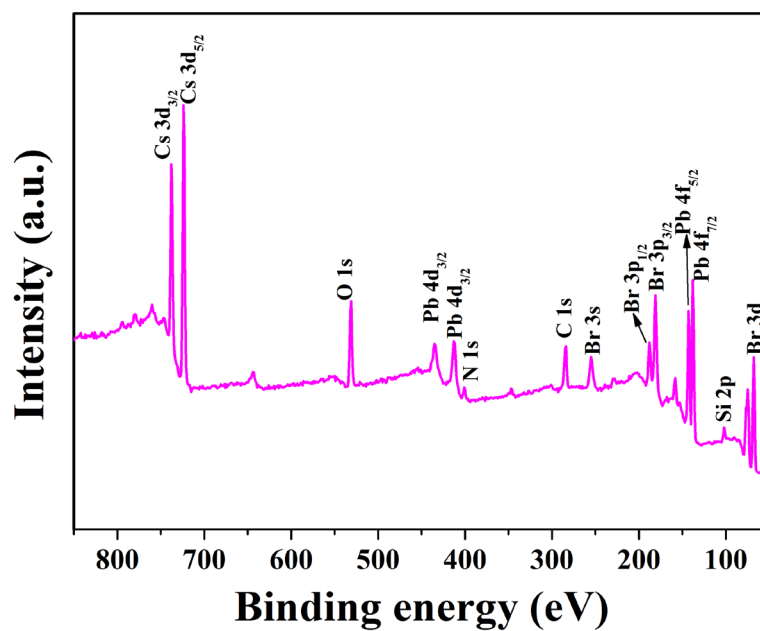

Figure S2. The XPS full spectrum of CsPbBr<sub>3</sub>@SiO<sub>2</sub> PNCCs.

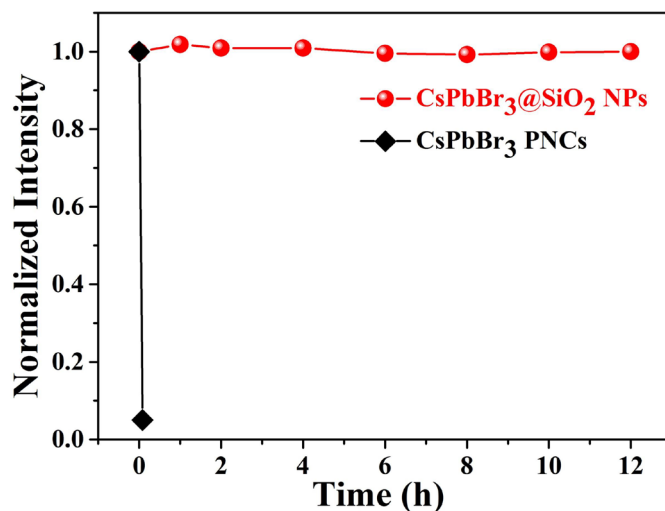

**Figure S3.** Stability comparison between CsPbBr<sub>3</sub>@SiO<sub>2</sub> PNCCs and CsPbBr<sub>3</sub> PNCs in ethanol according to the fluorescence intensity.

**Table S1.** The fitting parameters of the decay curves for the CsPbBr<sub>3</sub>@SiO<sub>2</sub> PNCCs with the addition of different concentration of Cl<sup>-</sup>.

| C <sub>Cl<sup>-</sup></sub> /mM | Wavelength /nm | τ <sub>1</sub> /ns (A <sub>1</sub> ) | τ <sub>2</sub> /ns (A <sub>2</sub> ) | τ <sub>3</sub> /ns (A <sub>3</sub> ) | τ <sub>avg</sub> /ns |
|---------------------------------|----------------|--------------------------------------|--------------------------------------|--------------------------------------|----------------------|
| 0                               | 512            | 0.99 (10.3%)                         | 4.83 (24.5%)                         | 30.33 (65.2%)                        | 28.75                |
| 60                              | 472            | 0.96 (17.5%)                         | 4.64 (29.5%)                         | 26.38 (53.0%)                        | 24.18                |
| 120                             | 457            | 1.03 (24.7%)                         | 4.07 (38.0%)                         | 19.13 (37.3%)                        | 16.01                |
| 180                             | 449            | 1.12 (20.3%)                         | 3.79 (53.9%)                         | 13.71 (25.7%)                        | 9.72                 |

Note: The PL decay curves were fitted using a triple-exponential function:

$$A(t) = A_0 + A_1 \exp(-t/\tau_1) + A_2 \exp(-t/\tau_2) + A_3 \exp(-t/\tau_3)$$

Where A and τ correspond to lifetime components and relative proportion of the triple-exponential function, respectively. t is the decay time. The average lifetime (τ) is calculated as:

$$\tau_{\text{avg}} = (A_1 \tau_1^2 + A_2 \tau_2^2 + A_3 \tau_3^2) / (A_1 \tau_1 + A_2 \tau_2 + A_3 \tau_3).$$
